# Supplementary material
Source: publisher figshare collection journal article supplement (https://acs.figshare.com/ndownloader/files/18002081)
Supplement: Supplementary file 1 [file 18002081]

## Bioactivation of GPR40 Agonist MK-8666: Formation of Protein Adducts in Vitro from Reactive Acyl Glucuronide and Acyl CoA Thioester

*Jackie Shang,<sup>\*,†</sup> Richard Tschirret-Guth,<sup>†,‡</sup> Mark Cancilla,<sup>§</sup> Koppara Samuel,<sup>†</sup> Qing Chen,<sup>†</sup> Harry R. Chobanian,<sup>†</sup> Ann Thomas,<sup>†</sup> Wei Tong,<sup>†,¶</sup> Hubert Josien,<sup>⊥</sup> Alexei V. Buevich,<sup>#</sup> Kaushik Mitra<sup>\*,¶</sup>*

<sup>†</sup>Department of Pharmacokinetics, Pharmacodynamics, and Drug Metabolism, <sup>⊥</sup>Department of Medicinal Chemistry, <sup>#</sup>Department of Analytical Research and Development, Merck & Co., Inc., Kenilworth, New Jersey 07033, United States

<sup>§</sup>Department of Pharmacokinetics, Pharmacodynamics, and Drug Metabolism, <sup>¶</sup>Department of Safety Assessment and Laboratory Animal Resources, Merck & Co., Inc., West Point, Pennsylvania 19586, United States

### \*Corresponding Author

Corresponding email: [shangjick@gmail.com](mailto:shangjick@gmail.com) or [kaushik\\_mitra@merck.com](mailto:kaushik_mitra@merck.com)

### Table of Contents

|                                                                                                                                |    |
|--------------------------------------------------------------------------------------------------------------------------------|----|
| <b>Table S1.</b> MS Characterization of MK-8666 and its major metabolites.....                                                 | S2 |
| <b>Figure S1.</b> Representative extracted ion chromatograms of MK-8666-1-O-β-acyl glucuronide and its rearranged isomers..... | S3 |
| <b>Figure S2.</b> Stability of MK-8666-1-O-β-acyl glucuronide in 0.1 M phosphate buffer (pH 7.4)..                             | S4 |

**Table S1.** MS Characterization of MK-8666 and its major metabolites.

| Metabolite | observed   |                          | calculated |      | $\Delta$ ppm | MSMS                         |
|------------|------------|--------------------------|------------|------|--------------|------------------------------|
|            | mass (m/z) | formula                  | mass (m/z) |      |              |                              |
| MK-8666    | 522.1970   | $C_{29}H_{32}NO_6S^+$    | 522.1945   | 4.8  |              | 522, 331, 121                |
| M1         | 538.1903   | $C_9H_{32}NO_7S^+$       | 538.1899   | 0.7  |              | 538, 502, 347, 329, 192, 121 |
| M2         | 538.1921   | $C_9H_{32}NO_7S^+$       | 538.1899   | 4.1  |              | 538, 520, 331, 121           |
| M3         | 538.1913   | $C_9H_{32}NO_7S^+$       | 538.1899   | 2.6  |              | 538, 520, 331, 121           |
| M4         | 698.2275   | $C_{35}H_{40}NO_{12}S^+$ | 698.2271   | 0.6  |              | 698, 522, 331, 121           |
| M5         | 629.1981   | $C_{35}H_{40}NO_{12}S^+$ | 629.1991   | -1.6 |              | 629, 504, 331, 121           |

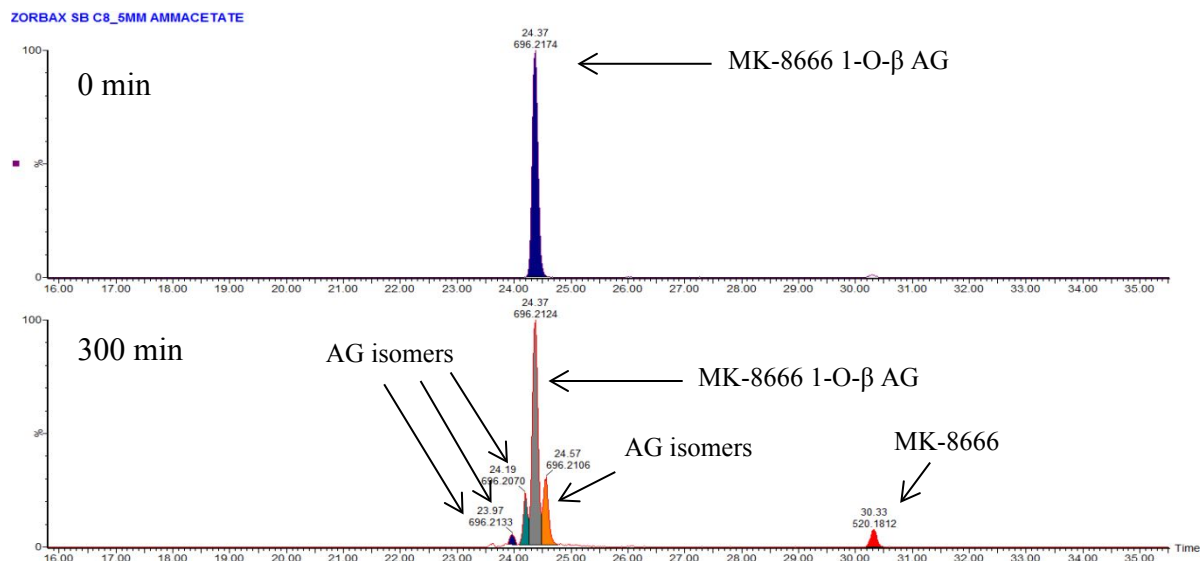

Figure S1. Representative extracted ion chromatograms of MK-8666-1-O-β-acyl glucuronide and its rearranged isomers following incubation of MK-8666-1-O-β-acyl glucuronide (10 μM) in 0.1 M phosphate buffer (pH 7.4) at 0 & 300 min. The detection of multiple peaks at m/z 696.2120 confirmed that MK-8666-1-O-β-acyl glucuronide formed rearranged isomers.

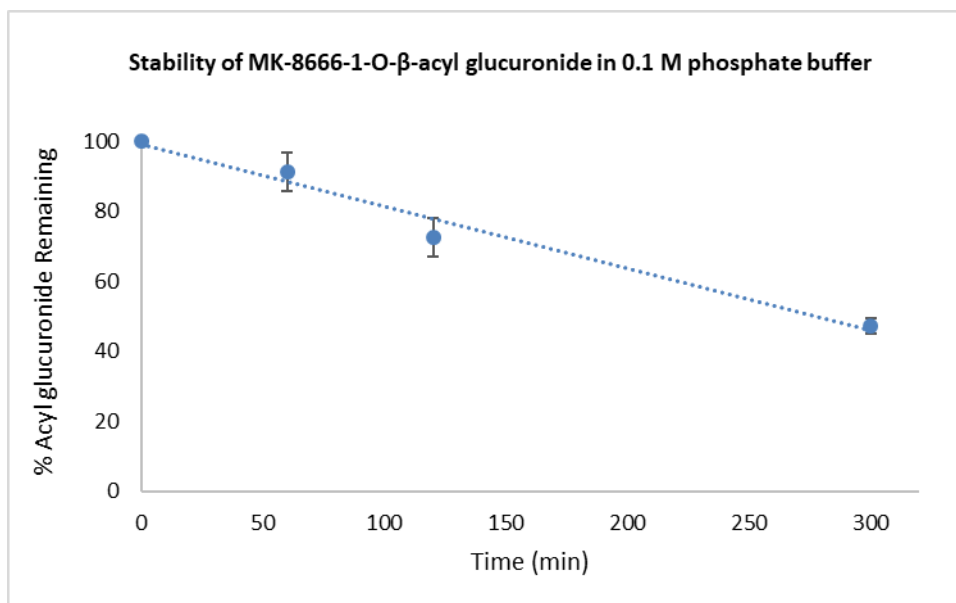

Figure S2. Percentage of MK-8666-1-O-β-acyl glucuronide remaining with the time course following incubation with 0.1 M phosphate buffer (pH 7.4) at 37°C. The degradation half-life of MK-8666-1-O-β-acyl glucuronide was determined from the percentage of AG remaining versus time curve by linear regression of the semilogarithmic plot. The half-life was calculated by the equation  $\ln 2/k$ , where  $k$  is the degradation rate constant.
